# Supplementary material
Source: PubMed Central journal article supplement (PMC8118770)
Supplement: 1217_table.pdf [file 1217_table.pdf]

**On-line Table. Ratings accuracy and discrimination between patients with familial CJD (S) and healthy age-matched controls (C)**

| Brain Region and Sequence | C, n (%) | S, n (%)             | X <sup>2</sup> P (LR)* | Sensitivity | Specificity |
|---------------------------|----------|----------------------|------------------------|-------------|-------------|
| CN-Put FLAIR RL           | 2 (9)    | 13 <sup>a</sup> (87) | <.0001                 | 87          | 91          |
| CN FLAIR L                | 0        | 12 (80)              | <.0001                 | 80          | 100         |
| CN FLAIR RL               | 0        | 12 (80)              | <.0001                 | 80          | 100         |
| CN FLAIR R                | 0        | 11 (73)              | <.0001                 | 73          | 100         |
| CN DWI R                  | 0        | 11 (73)              | <.0001                 | 73          | 100         |
| CN DWI L                  | 0        | 11 (73)              | <.0001                 | 73          | 100         |
| CN DWI RL                 | 0        | 11 (73)              | <.0001                 | 73          | 100         |
| CN-Put DWI RL             | 0        | 11 (73)              | <.0001                 | 73          | 100         |
| Put DWI RL                | 0        | 10 (67)              | <.0001                 | 67          | 100         |
| Put FLAIR RL              | 2 (9)    | 9 (60)               | .0007                  | 60          | 91          |
| Put FLAIR R               | 2 (9)    | 8 (53)               | .003                   | 53          | 91          |
| Put DWI R                 | 0        | 8 (53)               | <.0001                 | 53          | 100         |
| Put DWI L                 | 0        | 8 (53)               | <.0001                 | 53          | 100         |
| CN T2 R                   | 0        | 8 (53)               | <.0001                 | 53          | 100         |
| CN T2 L                   | 0        | 8 (53)               | <.0001                 | 53          | 100         |
| CN ADC R                  | 0        | 7 (47)               | <.0001                 | 47          | 100         |
| CN ADC L                  | 0        | 6 (40)               | .0004                  | 40          | 100         |
| CG GM DWI R               | 0        | 6 (40)               | .0004                  | 40          | 100         |
| Th DWI R                  | 0        | 6 (40)               | .0004                  | 40          | 100         |
| Th DWI L                  | 0        | 6 (40)               | .0004                  | 40          | 100         |

**Note:**—Only regions and sequences exceeding a sensitivity of 40% and a specificity of 91% are listed. CN indicates caudate nucleus; Put, putamen; Th, thalamus; CG, cingulate gyrus; GM, gray matter; R, right; L, left; RL, right, left, or both; DWI, diffusion-weighted image; FLAIR, fluid-attenuated inversion recovery image; T1, T1-weighted image; T2, T2-weighted image; ADC, apparent diffusion coefficient image.

\* X<sup>2</sup> P value based on the likelihood ratio (LR).
